# Supplementary material for: The Fragile X Mental Retardation Protein Regulates Striatal Medium Spiny Neuron Synapse Density and Dendritic Spine Morphology
Source: Front Mol Neurosci. 2020 Sep 10;13:161. doi: 10.3389/fnmol.2020.00161 (PMC7511717; doi:10.3389/fnmol.2020.00161)
Supplement: Supplementary file 1 [file Table_1.pdf]

Table S1.

| Figure | Statistical Analysis           | Dependent Variable                                          | Factor(s)             | DF      | $F / t / X^2$ value | P value             |
|--------|--------------------------------|-------------------------------------------------------------|-----------------------|---------|---------------------|---------------------|
| 1B     | Two-Way ANOVA                  | Synapsin WT vs KO, 10 DIV and 14 DIV                        | day                   | 1, 236  | 0.2973              | 0.05861             |
|        |                                |                                                             | genotype              | 1, 236  | 2.362               | 0.1257              |
|        |                                |                                                             | day x genotype        | 1, 236  | 0.0004437           | 0.09832             |
| 1C     | Two-Way ANOVA                  | PSD95 WT vs KO, 10 DIV and 14 DIV                           | day                   | 1, 236  | 17.09               | 0.00004954          |
|        |                                |                                                             | genotype              | 1, 236  | 0.4857              | 0.4865              |
|        |                                |                                                             | day x genotype        | 1, 236  | 4.134               | 0.04314             |
|        | Bonferroni Pairwise Comparison | PSD95, 10 DIV vs 14 DIV (WT only)                           | day                   |         |                     | 0.0001235           |
|        | Bonferroni Pairwise Comparison | PSD95, 10 DIV vs 14 DIV (KO only)                           | day                   |         |                     | 0.8245              |
|        | Bonferroni Pairwise Comparison | PSD95, WT vs KO (10 DIV)                                    | genotype              |         |                     | > 0.9999            |
|        | Bonferroni Pairwise Comparison | PSD95, WT vs KO (14 DIV)                                    | genotype              |         |                     | 0.2576              |
| 1D     | Two-Way ANOVA                  | Colocalized Puncta, WT vs KO, 10 DIV and 14 DIV             | day                   | 1, 236  | 13.13               | 0.0004              |
|        |                                |                                                             | genotype              | 1, 236  | 6.639               | 0.0106              |
|        |                                |                                                             | day x genotype        | 1, 236  | 1.889               | 0.1706              |
| Figure | Statistical Analysis           | Dependent Variable                                          | Factor(s)             | DF      | $F / t / X^2$ value | P value             |
| 2B     | Unpaired <i>t</i> Test         | Total Dendritic Spine Density, WT vs KO                     | genotype              | 98      | 5.382               | 0.000005044         |
| 2C     | Two-Way RM ANOVA               | Dendritic Spine Density by Type, WT vs KO                   | spine type            | 5, 490  | 95.3                | < 0.000000001       |
|        |                                |                                                             | genotype              | 1, 98   | 28.96               | 0.0000005           |
|        |                                |                                                             | spine type x genotype | 5, 490  | 5.323               | 0.00008944          |
|        | Bonferroni Pairwise Comparison | WT vs KO, Thin Spine Density                                | genotype              |         |                     | 0.00003318          |
|        | Bonferroni Pairwise Comparison | WT vs KO, Filopodia Spine Density                           | genotype              |         |                     | 0.002223            |
|        | Bonferroni Pairwise Comparison | WT vs KO, Stubby Spine Density                              | genotype              |         |                     | 0.0000004           |
|        | Bonferroni Pairwise Comparison | WT vs KO, Mushroom Spine Density                            | genotype              |         |                     | > 0.9999            |
|        | Bonferroni Pairwise Comparison | WT vs KO, Branched Spine Density                            | genotype              |         |                     | 0.6694              |
|        | Bonferroni Pairwise Comparison | WT vs KO, Thorny Spine Density                              | genotype              |         |                     | > 0.9999            |
| Figure | Statistical Analysis           | Dependent Variable                                          | Factor(s)             | DF      | $F / t / X^2$ value | P value             |
| 3B     | One-Way ANOVA                  | Synapsin WT vs GFP vs I304N vs ΔRGG                         | plasmid               | 3, 152  | 5.668               | 0.0010              |
|        | Bonferroni Pairwise Comparison | Synapsin WT vs GFP                                          | plasmid               |         |                     | 0.4099              |
|        | Bonferroni Pairwise Comparison | Synapsin WT vs I304N                                        | plasmid               |         |                     | > 0.9999            |
|        | Bonferroni Pairwise Comparison | Synapsin WT vs ΔRGG                                         | plasmid               |         |                     | 0.0032              |
|        | Bonferroni Pairwise Comparison | Synapsin GFP vs I304N                                       | plasmid               |         |                     | 0.6008              |
|        | Bonferroni Pairwise Comparison | Synapsin GFP vs ΔRGG                                        | plasmid               |         |                     | 0.1368              |
|        | Bonferroni Pairwise Comparison | Synapsin I304N vs ΔRGG                                      | plasmid               |         |                     | 0.0027              |
| 3C     | One-Way ANOVA                  | PSD95 WT vs GFP vs I304N vs ΔRGG                            | plasmid               | 3, 152  | 11.5                | 0.00000078          |
|        | Bonferroni Pairwise Comparison | PSD95 WT vs GFP                                             | plasmid               |         |                     | 0.00002             |
|        | Bonferroni Pairwise Comparison | PSD95 WT vs I304N                                           | plasmid               |         |                     | 0.0076              |
|        | Bonferroni Pairwise Comparison | PSD95 WT vs ΔRGG                                            | plasmid               |         |                     | 0.00000099          |
|        | Bonferroni Pairwise Comparison | PSD95 GFP vs I304N                                          | plasmid               |         |                     | 0.546               |
|        | Bonferroni Pairwise Comparison | PSD95 GFP vs ΔRGG                                           | plasmid               |         |                     | 0.826               |
|        | Bonferroni Pairwise Comparison | PSD95 I304N vs ΔRGG                                         | plasmid               |         |                     | 0.029               |
| 3D     | One-Way ANOVA                  | Colocalized Puncta, WT vs GFP vs I304N vs ΔRGG              | plasmid               | 3, 152  | 5.262               | 0.0018              |
|        | Bonferroni Pairwise Comparison | Colocalized Puncta WT vs GFP                                | plasmid               |         |                     | 0.0735              |
|        | Bonferroni Pairwise Comparison | Colocalized Puncta WT vs I304N                              | plasmid               |         |                     | 0.0593              |
|        | Bonferroni Pairwise Comparison | Colocalized Puncta WT vs ΔRGG                               | plasmid               |         |                     | > 0.9999            |
|        | Bonferroni Pairwise Comparison | Colocalized Puncta GFP vs I304N                             | plasmid               |         |                     | > 0.9999            |
|        | Bonferroni Pairwise Comparison | Colocalized Puncta GFP vs ΔRGG                              | plasmid               |         |                     | 0.0200              |
|        | Bonferroni Pairwise Comparison | Colocalized Puncta I304N vs ΔRGG                            | plasmid               |         |                     | 0.0167              |
| Figure | Statistical Analysis           | Dependent Variable                                          | Factor(s)             | DF      | $F / t / X^2$ value | P value             |
| 4B     | One-Way ANOVA                  | Total Dendritic Spine Density, WT vs GFP vs I304N vs ΔRGG   | plasmid               | 3, 143  | 4.586               | 0.0043              |
|        | Bonferroni Pairwise Comparison | Total Spine Density, WT vs GFP                              | plasmid               |         |                     | 0.037               |
|        | Bonferroni Pairwise Comparison | Total Spine Density, WT vs I304N                            | plasmid               |         |                     | > 0.9999            |
|        | Bonferroni Pairwise Comparison | Total Spine Density, WT vs ΔRGG                             | plasmid               |         |                     | > 0.9999            |
|        | Bonferroni Pairwise Comparison | Total Spine Density, GFP vs I304N                           | plasmid               |         |                     | 0.0333              |
|        | Bonferroni Pairwise Comparison | Total Spine Density, GFP vs ΔRGG                            | plasmid               |         |                     | 0.0077              |
|        | Bonferroni Pairwise Comparison | Total Spine Density, I304N vs ΔRGG                          | plasmid               |         |                     | > 0.9999            |
|        | Two-Way RM ANOVA               | Dendritic Spine Density by Type, WT vs GFP vs I304N vs ΔRGG | spine type            | 5, 715  | 220.3               | < 0.000000000000001 |
|        |                                |                                                             | plasmid               | 3, 143  | 4.586               | 0.00426             |
|        |                                |                                                             | spine type x plasmid  | 15, 715 | 1.76                | 0.036               |
|        | Bonferroni Pairwise Comparison | Thin Spine Density, WT vs GFP                               | plasmid               |         |                     | 0.277               |
|        | Bonferroni Pairwise Comparison | Thin Spine Density, WT vs I304N                             | plasmid               |         |                     | > 0.9999            |
|        | Bonferroni Pairwise Comparison | Thin Spine Density, WT vs ΔRGG                              | plasmid               |         |                     | > 0.9999            |
|        | Bonferroni Pairwise Comparison | Thin Spine Density, GFP vs I304N                            | plasmid               |         |                     | 0.067               |
|        | Bonferroni Pairwise Comparison | Thin Spine Density, GFP vs ΔRGG                             | plasmid               |         |                     | 0.409               |
|        | Bonferroni Pairwise Comparison | Thin Spine Density, I304N vs ΔRGG                           | plasmid               |         |                     | > 0.9999            |
|        | Bonferroni Pairwise Comparison | Filopodia Spine Density, WT vs GFP                          | plasmid               |         |                     | 0.7759              |
|        | Bonferroni Pairwise Comparison | Filopodia Spine Density, WT vs I304N                        | plasmid               |         |                     | > 0.9999            |
|        | Bonferroni Pairwise Comparison | Filopodia Spine Density, WT vs ΔRGG                         | plasmid               |         |                     | > 0.9999            |
|        | Bonferroni Pairwise Comparison | Filopodia Spine Density, GFP vs I304N                       | plasmid               |         |                     | 0.1431              |
|        | Bonferroni Pairwise Comparison | Filopodia Spine Density, GFP vs ΔRGG                        | plasmid               |         |                     | 0.0362              |
|        | Bonferroni Pairwise Comparison | Filopodia Spine Density, I304N vs ΔRGG                      | plasmid               |         |                     | > 0.9999            |
|        | Bonferroni Pairwise Comparison | Stubby Spine Density, WT vs GFP                             | plasmid               |         |                     | > 0.9999            |
|        | Bonferroni Pairwise Comparison | Stubby Spine Density, WT vs I304N                           | plasmid               |         |                     | > 0.9999            |
|        | Bonferroni Pairwise Comparison | Stubby Spine Density, WT vs ΔRGG                            | plasmid               |         |                     | > 0.9999            |
|        | Bonferroni Pairwise Comparison | Stubby Spine Density, GFP vs I304N                          | plasmid               |         |                     | 0.133               |
|        | Bonferroni Pairwise Comparison | Stubby Spine Density, GFP vs ΔRGG                           | plasmid               |         |                     | 0.1825              |
|        | Bonferroni Pairwise Comparison | Stubby Spine Density, I304N vs ΔRGG                         | plasmid               |         |                     | > 0.9999            |
|        | Bonferroni Pairwise Comparison | Mushroom Spine Density, WT vs GFP                           | plasmid               |         |                     | > 0.9999            |
|        | Bonferroni Pairwise Comparison | Mushroom Spine Density, WT vs I304N                         | plasmid               |         |                     | > 0.9999            |
|        | Bonferroni Pairwise Comparison | Mushroom Spine Density, WT vs ΔRGG                          | plasmid               |         |                     | > 0.9999            |
|        | Bonferroni Pairwise Comparison | Mushroom Spine Density, GFP vs I304N                        | plasmid               |         |                     | > 0.9999            |
|        | Bonferroni Pairwise Comparison | Mushroom Spine Density, GFP vs ΔRGG                         | plasmid               |         |                     | > 0.9999            |
|        | Bonferroni Pairwise Comparison | Mushroom Spine Density, I304N vs ΔRGG                       | plasmid               |         |                     | > 0.9999            |
|        | Bonferroni Pairwise Comparison | Branched Spine Density, WT vs GFP                           | plasmid               |         |                     | > 0.9999            |
|        | Bonferroni Pairwise Comparison | Branched Spine Density, WT vs I304N                         | plasmid               |         |                     | > 0.9999            |
|        | Bonferroni Pairwise Comparison | Branched Spine Density, WT vs ΔRGG                          | plasmid               |         |                     | > 0.9999            |
|        | Bonferroni Pairwise Comparison | Branched Spine Density, GFP vs I304N                        | plasmid               |         |                     | > 0.9999            |
|        | Bonferroni Pairwise Comparison | Branched Spine Density, GFP vs ΔRGG                         | plasmid               |         |                     | > 0.9999            |
|        | Bonferroni Pairwise Comparison | Branched Spine Density, I304N vs ΔRGG                       | plasmid               |         |                     | > 0.9999            |
|        | Bonferroni Pairwise Comparison | Thorny Spine Density, WT vs GFP                             | plasmid               |         |                     | > 0.9999            |
|        | Bonferroni Pairwise Comparison | Thorny Spine Density, WT vs I304N                           | plasmid               |         |                     | > 0.9999            |
|        | Bonferroni Pairwise Comparison | Thorny Spine Density, WT vs ΔRGG                            | plasmid               |         |                     | > 0.9999            |
|        | Bonferroni Pairwise Comparison | Thorny Spine Density, GFP vs I304N                          | plasmid               |         |                     | > 0.9999            |
|        | Bonferroni Pairwise Comparison | Thorny Spine Density, GFP vs ΔRGG                           | plasmid               |         |                     | > 0.9999            |
|        | Bonferroni Pairwise Comparison | Thorny Spine Density, I304N vs ΔRGG                         | plasmid               |         |                     | > 0.9999            |
| 4D     | One-Way ANOVA                  | Spine Head Maximum Diameter, WT vs GFP vs I304N vs ΔRGG     | plasmid               | 3, 5241 | 53.08               | < 0.000000000000001 |
|        | Bonferroni Pairwise Comparison | Spine Head Maximum Diameter, WT vs GFP                      | plasmid               |         |                     | 0.055               |
|        | Bonferroni Pairwise Comparison | Spine Head Maximum Diameter, WT vs I304N                    | plasmid               |         |                     | < 0.000000000000001 |
|        | Bonferroni Pairwise Comparison | Spine Head Maximum Diameter, WT vs ΔRGG                     | plasmid               |         |                     | 0.7554              |
|        | Bonferroni Pairwise Comparison | Spine Head Maximum Diameter, GFP vs I304N                   | plasmid               |         |                     | < 0.000000000000001 |
|        | Bonferroni Pairwise Comparison | Spine Head Maximum Diameter, GFP vs ΔRGG                    | plasmid               |         |                     | < 0.000186          |
|        | Bonferroni Pairwise Comparison | Spine Head Maximum Diameter, I304N vs ΔRGG                  | plasmid               |         |                     | < 0.0000000000207   |
